# Supplementary material for: A cell-centered, agent-based framework that enables flexible environment granularities
Source: PubMed Central journal article supplement (PMC4736144; doi:10.1186/s12976-016-0030-9), 2016-02-02
Supplement: 12976_2016_30_MOESM1_ESM.pdf [file 12976_2016_30_MOESM1_ESM.pdf]

## 2D V-cell Algorithm

-Let  $P$  be the set of input points in 2D space  
-DELAUNAY2D( $P$ ) returns the triangulation for a given set of points  $P$ , which represent the V-cell centers  
-CIRCUMCENTER( $t$ ) returns the center of circle which passes through all vertices of the given triangle  $t$   
-GETNEXTVERTEX( $v_1, v_2, t.id$ ) takes two vertices,  $v_1$  and  $v_2$ , and the id of the current triangle,  $t.id$ , and returns the next triangle with forming points  $v_1$  and  $v_2$  and which also shares an edge with  $t.id$ , without backtracking  
-COUNTERCLOCKWISE(pointsList) takes a list of points and returns the points in sorted counterclockwise order  
-CREATEPOLYGON(pointsList) takes a list of counterclockwise points and creates a polygon

**procedure** CALCULATEVCELLS2D( $P$ )

$T \leftarrow$  DELAUNAY2D( $P$ )

**for all**  $p_i \in P$  **do**

**for all**  $t_j \in T$  **do**

**if**  $t_j.contains(p_i)$  **then** //if  $p_i$  exists as a point in  $t_j$

      centerFormingPoint  $\leftarrow$   $t_j.pointOne$

      secondFormingPoint  $\leftarrow$   $t_j.pointTwo$

      currentTriangle  $\leftarrow$   $t_j$

      startTriangle  $\leftarrow$   $t_j$

      triangleList.add(currentTriangle)

      circumcenterPointsList.add(CIRCUMCENTER(currentTriangle))

**repeat**

$t_k \leftarrow$  GETNEXTVERTEX(centerFormingPoint, secondFormingPoint,  
                                  currentVertex)

        currentVertex  $\leftarrow$   $t_k$

        secondFormingPoint  $\leftarrow$   $t_k.pointTwo$

        circumcenterPointsList.add(CIRCUMCENTER(currentTriangle))

**until** currentTriangle.equals(startTriangle)

      vCells.add( $p_i.id$ )

      vCenters.add(circumcenterPointsList)

**endif**

**end for**

**end for**

**for all** circumcenterPointsList  $\in$  vCenters **do**

  counterClockwisePointsList  $\leftarrow$  COUNTERCLOCKWISE(circumcenterPointsList <sub>$i$</sub> )

  vCellPolygonList.add(CREATEPOLYGON(counterClockwisePointsList))

  vCellCentersList.add(vCells.get( $i$ ))

**end for**

**end for**

**return** vCellPolygonList, vCellCentersList
