# Supplementary material for: A cell-centered, agent-based framework that enables flexible environment granularities
Source: PubMed Central journal article supplement (PMC4736144; doi:10.1186/s12976-016-0030-9), 2016-02-02
Supplement: 12976_2016_30_MOESM2_ESM.pdf [file 12976_2016_30_MOESM2_ESM.pdf]

### 3D V-cell Algorithm

-Let  $P$  be the set of input points in 3D space  
-DELAUNAY3D( $P$ ) returns the 3D triangulation (as a set of tetrahedra) for a given set of points  $P$ , which represent the V-cell centers  
-CIRCUMCENTER( $t$ ) returns the center of sphere which passes through all vertices of the given tetrahedron  $t$   
-GETFACES( $p, t$ ) returns the 3 triangles from tetrahedron  $t$  which share a point with  $p$   
-GETADJACENTTETRA( $p, tri$ ) returns the tetrahedra which shares a point with  $p$  and a face with triangle  $tri$   
-ADDTRIANGLE( $p_1, p_2, p_3$ ) returns a triangle containing given points  $p_1, p_2$ , and  $p_3$

**procedure** CALCULATEVCELLS3D( $P$ )

$T \leftarrow$  DELAUNAY3D( $P$ )

**for all**  $p_i \in P$  **do**

**for all**  $t_j \in T$  **do**

**if**  $t_j$ .contains( $p$ ) **then** //if  $p_i$  exists as a point in  $t_j$

$p_i$ .tetras.add( $t_j$ )

**end if**

**end for**

**end for**

**for all**  $p_i \in P$  **do**

**for all**  $t_j \in p_i$  **do**

$t_j$ .center  $\leftarrow$  CIRCUMCENTER( $t_j$ )

$t_j$ .faces  $\leftarrow$  GETFACES( $p_i, t_j$ )

**for all**  $triangle_k \in t_j$ .faces **do** //for the 3 triangle faces

$triangle_k$ .tetra  $\leftarrow$  GETADJACENTTETRA( $p_i, triangle_k$ )

$triangle_k$ .tetraCenter  $\leftarrow$  CIRCUMCENTER( $triangle_k$ .tetra)

**end for**

    vCellList( $p_i$ ).ADDTRIANGLE( $t_j$ .center,  $triangle_0$ .tetraCenter,  $triangle_1$ .tetraCenter)

    vCellList( $p_i$ ).ADDTRIANGLE( $t_j$ .center,  $triangle_0$ .tetraCenter,  $triangle_2$ .tetraCenter)

    vCellList( $p_i$ ).ADDTRIANGLE( $t_j$ .center,  $triangle_1$ .tetraCenter,  $triangle_2$ .tetraCenter)

**end for**

**end for**

**return** vCellList
